# Supplementary material for: Ti2C-TiO2 MXene Nanocomposite-Based High-Efficiency Non-Enzymatic Glucose Sensing Platform for Diabetes Monitoring
Source: MDPI journal article supplement (doi:10.3390/s22155589), 2022-07-26
Supplement: s1 [file s1]

## Supplementary information!

### **Ti<sub>2</sub>C-TiO<sub>2</sub> MXene nanocomposite based high efficient non-enzymatic Glucose sensing platform for diabetes monitoring**

Vinod Kumar<sup>1†\*</sup>, Sudheesh K. Shukla<sup>2</sup>, Meenakshi Choudhary<sup>3†</sup>, Jalaj Gupta<sup>1</sup>, Priyanka Chaudhary<sup>4</sup>, Saurabh Srivastava<sup>5</sup>, Mukesh Kumar<sup>6</sup>, Manoj Kumar<sup>7</sup>, Devojit Kumar Sarma<sup>7</sup>, Bal Chandra Yadav<sup>4</sup>, Vinod Verma<sup>1\*</sup>

<sup>1</sup>Stem Cell Research Centre, Department of Hematology, Sanjay Gandhi Post Graduate Institute of Medical Sciences, Lucknow-226014, UP, India

<sup>2</sup>Department of Biomedical Engineering, Shobhit Institute of Engineering & Technology (Deemed to-be-University), Meerut-250110, U.P., India

<sup>3</sup>Department of Solar Energy and Environmental Physics, The Swiss Institute of Dryland, Environmental and Energy Research, The Jacob Blaustein Institutes for Desert Research, Ben-Gurion University of the Negev, Midreshet Ben-Gurion-8499000, Israel

<sup>4</sup>School of Physical & Decision Sciences, Babasaheb Bhimrao Ambedkar University, (A central University) Lucknow-226025, U.P., India

<sup>5</sup>Department of Applied Sciences & Humanities, Rajkiya Engineering College Ambedkar Nagar (affiliated to Dr. A.P.J. Abdul Kalam Technical University, Uttar Pradesh), Ambedkar Nagar-224122, U.P., India

<sup>6</sup>Department of Zoology, Babasaheb Bhimrao Ambedkar University, (A central University) Lucknow-226025, U.P., India

<sup>7</sup>ICMR- National Institute for Research in Environmental Health, Bhopal Bypass Road, Bhouri, Bhopal - 462030, Madhya Pradesh, India

† Equal contributors

*\*Correspondence:*

1. [vverma29@gmail.com](mailto:vverma29@gmail.com)

2. [mail2vinod2@gmail.com](mailto:mail2vinod2@gmail.com)

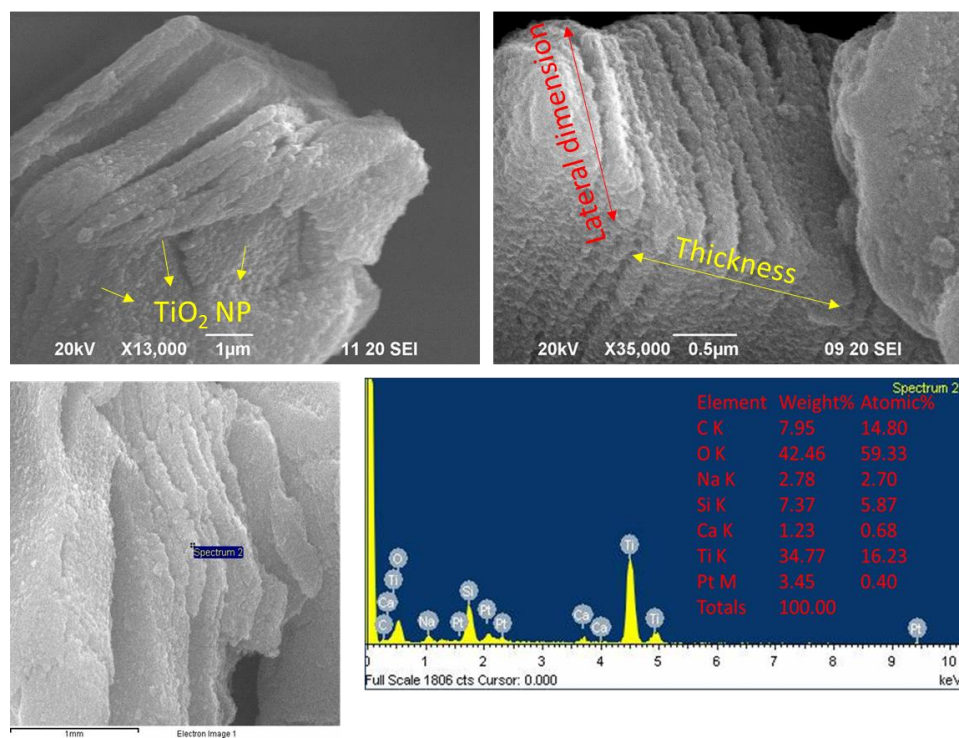

**Figure S1.** SEM of synthesized MXene nanocomposite and elemental analysis

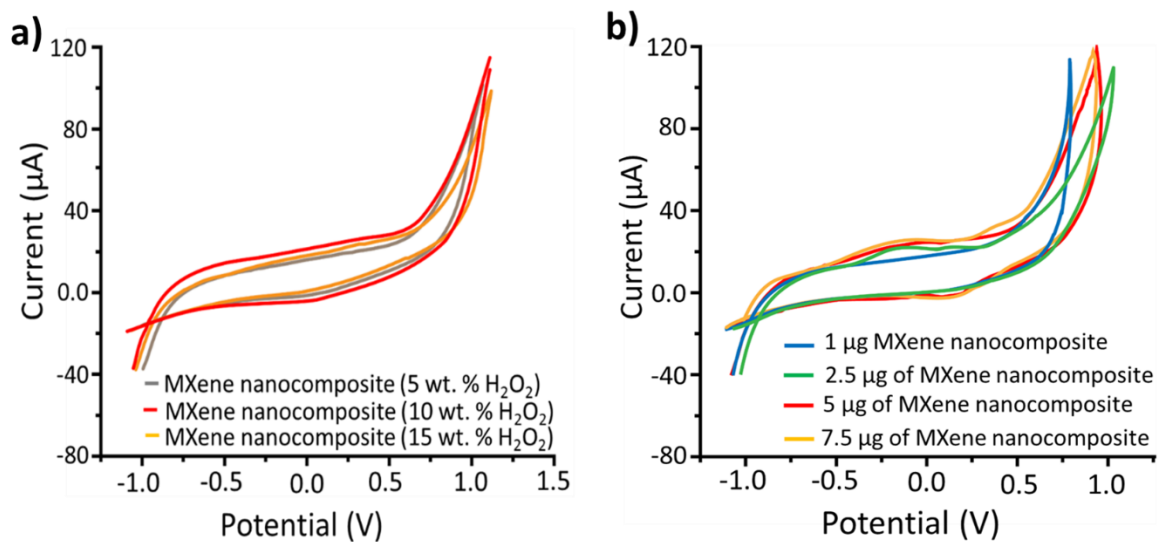

**Figure S2.** a) Electrochemical characterization of synthesized nanocomposites, b) Optimization of electrochemical response of MXene nanocomposite

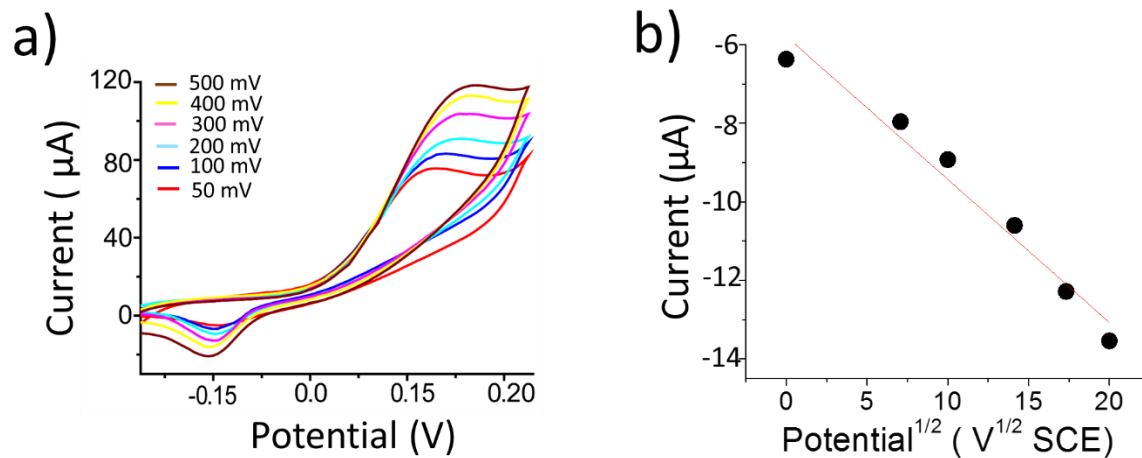

**Figure S3.** a) Scan rate dependent CV of nanocomposite modified electrode, b) cathodic current Vs square root of scan rate

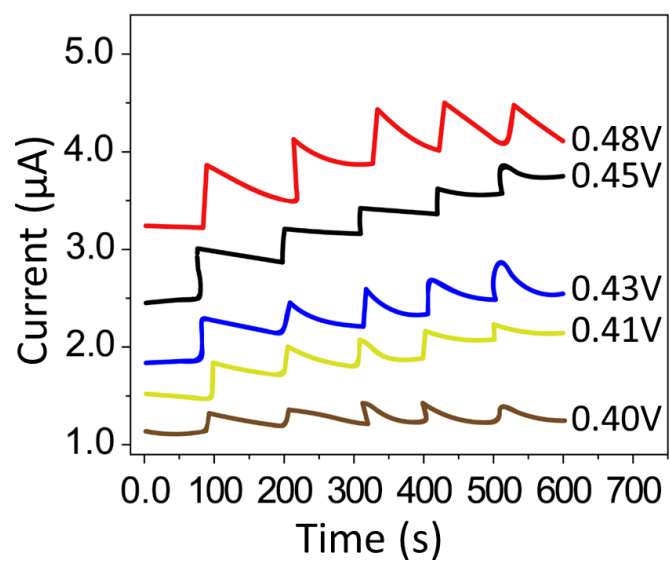

**Figure S4.** Optimization of chronoamperometry potential of nanocomposite with 0.1  $\mu\text{M}$  of glucose added in 0.1 M NaOH
